# Supplementary material
Source: HighWire-hosted journal article supplement (https://erj.ersjournals.com/content/59/1/2102388)
Supplement: inline-supplementary-material-1 [file inline-supplementary-material-1.pdf]

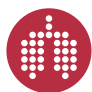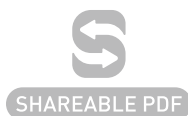

# Double-lung transplantation followed by delayed percutaneous repair for atrial septal defect-associated pulmonary arterial hypertension

Pierre Gazengel<sup>1,2,3</sup>, Sébastien Hascoët<sup>2,3,4</sup>, Myriam Amsallem<sup>2,3,5</sup>, Laurent Savale<sup>1,2,3,6</sup>, David Montani<sup>1,2,3,6</sup>, Olaf Mercier<sup>1,2,3</sup>, Marc Humbert<sup>1,2,3,6</sup>, Elie Fadel<sup>1,2,3</sup> and Jérôme Le Pavéc<sup>1,2,3</sup>

<sup>1</sup>Service de Chirurgie Thoracique, Vasculaire et Transplantation Cardio-pulmonaire, Hôpital Marie-Lannelongue, Le Plessis-Robinson, France. <sup>2</sup>Université Paris-Saclay, Faculty of Medicine, Le Kremlin-Bicêtre, France. <sup>3</sup>INSERM UMR\_S 999, Hôpital Marie Lannelongue, Le Plessis-Robinson, France. <sup>4</sup>Service de cardiopathie congénitale de l'enfant et de l'adulte, Hôpital Marie-Lannelongue, Le Plessis-Robinson, France. <sup>5</sup>Service de cardiologie, Hôpital Marie-Lannelongue, Le Plessis-Robinson, France. <sup>6</sup>Assistance Publique - Hôpitaux de Paris (AP-HP), Dept of Respiratory and Intensive Care Medicine, Hôpital Bicêtre, Le Kremlin-Bicêtre, France.

Corresponding author: Jérôme Le Pavéc ([lepavec@gmail.com](mailto:lepavec@gmail.com))

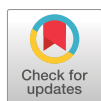

Shareable abstract (@ERSpublications)

In pulmonary hypertension with right heart failure due to atrial septal defect, double-lung transplantation then percutaneous defect closure 3–6 months later compared favourably with the standard approach consisting of heart–lung transplantation <https://bit.ly/3BjdLzw>

**Cite this article as:** Gazengel P, Hascoët S, Amsallem M, *et al.* Double-lung transplantation followed by delayed percutaneous repair for atrial septal defect-associated pulmonary arterial hypertension. *Eur Respir J* 2022; 59: 2102388 [DOI: 10.1183/13993003.02388-2021].

This single-page version can be shared freely online.

Copyright ©The authors 2022. For reproduction rights and permissions contact [permissions@ersnet.org](mailto:permissions@ersnet.org)

Received: 1 Sept 2021  
Accepted: 15 Oct 2021

*To the Editor:*

Pulmonary arterial hypertension (PAH) is a rare but severe complication of unrepaired atrial septal defect (ASD) and appears to be among the strongest predictors of death in adults with Eisenmenger syndrome [1]. For decades, heart–lung transplantation (HLT<sub>x</sub>) has been considered the best treatment of last resort for patients with ASD-associated PAH and right ventricular failure. Nonetheless, over 25% of patients die within 1 year after the procedure [2]. In addition, severe organ shortages result in long waiting list times, during which the frequency of clinical deterioration or death exceeds 30% [3]. Double-lung transplantation (DLT<sub>x</sub>) with concomitant surgical cardiac-defect repair has been suggested as an attractive alternative for patients with ASD-associated PAH [4]. However, due to the limited number of patients with ASD-associated PAH treated by HLT<sub>x</sub> or DLT<sub>x</sub>, the available scientific evidence is insufficient to define the best strategy.
